# Supplementary material for: Styrene–butadiene–styrene-based stretchable electrospun nanofibers by carbon nanotube inclusion
Source: Royal Society of Chemistry journal article supplement (doi:10.1039/d3me00035d), 2023-01-01
Supplement: d3me00035d1.pdf [file d3me00035d1.pdf]

## Supplementary Material

### Styrene-butadiene-styrene-based stretchable electrospun

#### nanofibers by carbon nanotube inclusion

Baran Sarac,<sup>a</sup> Remzi Gürbüz,<sup>b</sup> Matej Micusik,<sup>c</sup> Maria Omastova,<sup>c</sup> Amir Rezvan,<sup>a,d</sup> Eray Yüce,<sup>a,d</sup> Lixia Xi,<sup>e</sup> Jürgen Eckert,<sup>a,d</sup> Ali Ozcan<sup>b</sup> and A. Sezai Sarac\*<sup>f</sup>

<sup>a</sup>*Erich Schmid Institute of Materials Science, Austrian Academy of Sciences, 8700 Leoben, Austria*

<sup>b</sup>*Faculty of Science, Department of Chemistry, Eskisehir Technical University, Eskisehir 26555, Turkey*

<sup>c</sup>*Polymer Institute, Slovak Academy of Sciences, Bratislava 84541, Slovakia*

<sup>d</sup>*Department of Materials Science, Montanuniversität Leoben, 8700 Leoben, Austria*

<sup>e</sup>*College of Material Science and Technology, Nanjing University of Aeronautics and Astronautics, Yudao Street 29, 210016 Nanjing, China*

<sup>f</sup>*Polymer Science and Technology, Istanbul Technical University, Istanbul, Turkey*

**\*Correspondence:** A. Sezai Sarac, Polymer Science and Technology, Istanbul Technical University, 34469 Istanbul, Turkey. Email: [sarac@itu.edu.tr](mailto:sarac@itu.edu.tr)

**Table S1** XPS peak table of SBS/PStyr.

| Name       | Start BE | Peak BE | End BE | FWHM eV | Area (P) CPS.eV | Atomic % |
|------------|----------|---------|--------|---------|-----------------|----------|
| O1s C=O    | 544,28   | 532,34  | 525,18 | 1,73    | 23354,34        | 6,5      |
| O1s C-O    | 544,28   | 533,69  | 525,18 | 1,73    | 13389,68        | 3,8      |
| C1s sp3    | 297,28   | 284,8   | 279,18 | 1,54    | 17700,34        | 12,0     |
| C1s C-O    | 297,28   | 285,8   | 279,18 | 0,8     | 3839,21         | 2,6      |
| C1s C=O    | 297,28   | 286,6   | 279,18 | 1,54    | 13914,28        | 9,4      |
| C1s OCO    | 297,28   | 288,73  | 279,18 | 1,73    | 3970,6          | 2,7      |
| C1s sp2    | 297,28   | 284,42  | 279,18 | 1,37    | 89504,3         | 60,5     |
| C1s Pi-Pi* | 297,28   | 291,15  | 279,18 | 1,69    | 3638,2          | 2,5      |

**Table S2** XPS peak table of SBS/PStyr/CNT.

| Name       | Start BE | Peak BE | End BE | FWHM eV | Area (P) CPS.eV | Atomic % |
|------------|----------|---------|--------|---------|-----------------|----------|
| O1s C=O    | 544,28   | 531,78  | 525,18 | 1,73    | 9481,72         | 3,25     |
| O1s C-O    | 544,28   | 533,26  | 525,18 | 1,73    | 4216,25         | 1,45     |
| C1s sp3    | 297,28   | 285,19  | 279,18 | 1,54    | 1377,53         | 1,14     |
| C1s C-O    | 297,28   | 285,8   | 279,18 | 0,88    | 3761,05         | 3,12     |
| C1s C=O    | 297,28   | 286,6   | 279,18 | 1,54    | 4805,8          | 3,99     |
| C1s OCO    | 297,28   | 288,73  | 279,18 | 1,73    | 40,35           | 0,03     |
| C1s sp2    | 297,28   | 284,44  | 279,18 | 1,29    | 102263,89       | 84,68    |
| C1s Pi-Pi* | 297,28   | 291,02  | 279,18 | 1,75    | 2821,21         | 2,35     |

**Table S3** XPS peak table of PStyr/PBu.

| Name       | Start BE | Peak BE | End BE | FWHM eV | Area (P) CPS.eV | Atomic % |
|------------|----------|---------|--------|---------|-----------------|----------|
| O1s C=O    | 544,28   | 531,83  | 525,18 | 1,65    | 22968,25        | 7,8      |
| O1s C-O    | 544,28   | 534     | 525,18 | 1,73    | 3586,14         | 1,2      |
| C1s sp3    | 297,28   | 285,2   | 279,18 | 0,63    | 1758,52         | 1,5      |
| C1s C-O    | 297,28   | 285,8   | 279,18 | 0,97    | 5497,91         | 4,5      |
| C1s C=O    | 297,28   | 286,6   | 279,18 | 1,54    | 6149,42         | 5,1      |
| C1s OCO    | 297,28   | 288,73  | 279,18 | 1,73    | 37,09           | 0,0      |
| C1s sp2    | 297,28   | 284,31  | 279,18 | 1,4     | 94513,47        | 77,7     |
| C1s Pi-Pi* | 297,28   | 290,95  | 279,18 | 1,68    | 2605,36         | 2,2      |

**Table S4** XPS peak table of PStyr/PBu/CNT.

| Name       | Start BE | Peak BE | End BE | FWHM eV | Area (P) CPS.eV | Atomic % |
|------------|----------|---------|--------|---------|-----------------|----------|
| O1s C=O    | 544,28   | 531,78  | 525,18 | 1,73    | 9481,72         | 3,25     |
| O1s C-O    | 544,28   | 533,26  | 525,18 | 1,73    | 4216,25         | 1,45     |
| C1s sp3    | 297,28   | 285,19  | 279,18 | 1,54    | 1377,53         | 1,14     |
| C1s C-O    | 297,28   | 285,8   | 279,18 | 0,88    | 3761,05         | 3,12     |
| C1s C=O    | 297,28   | 286,6   | 279,18 | 1,54    | 4805,8          | 3,99     |
| C1s OCO    | 297,28   | 288,73  | 279,18 | 1,73    | 40,35           | 0,03     |
| C1s sp2    | 297,28   | 284,44  | 279,18 | 1,29    | 102263,89       | 84,68    |
| C1s Pi-Pi* | 297,28   | 291,02  | 279,18 | 1,75    | 2821,21         | 2,35     |

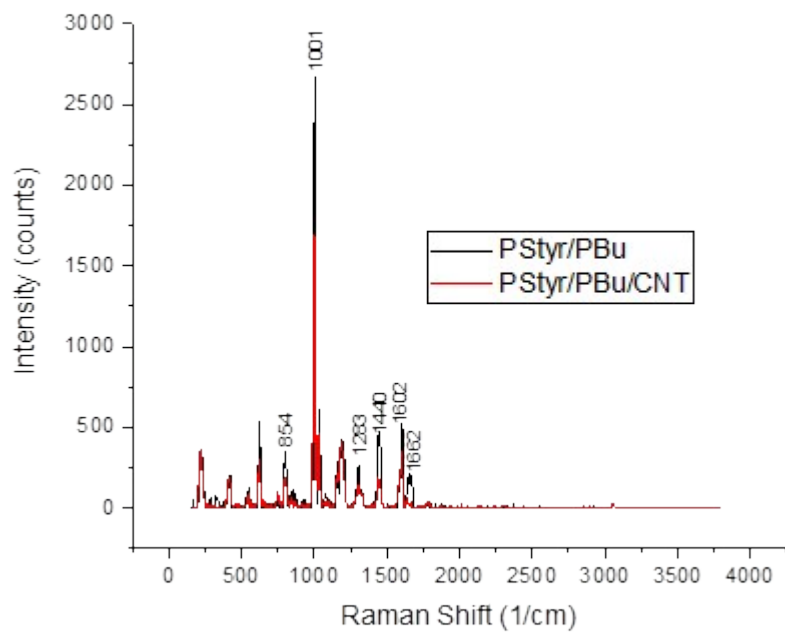

**Fig. S1** Comparison of the Raman plots for PStyr/PBu and PStyr/PBu/CNT samples.

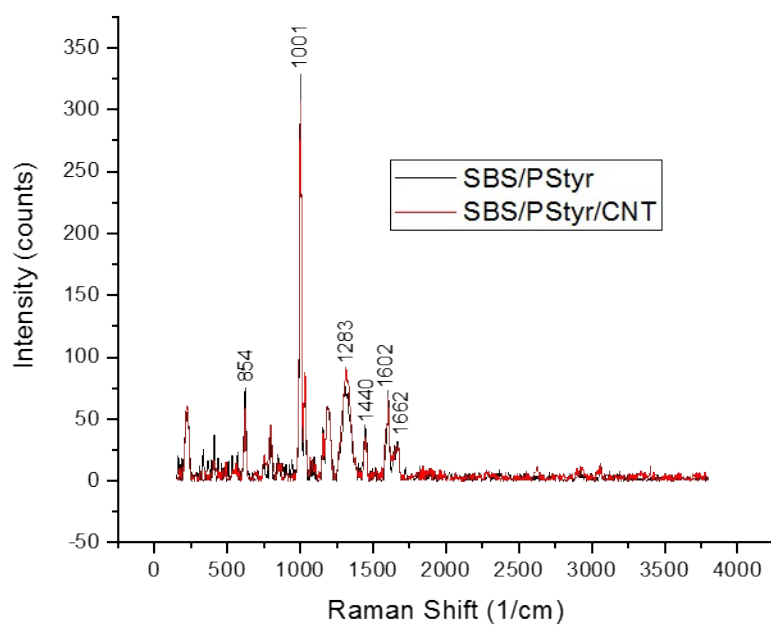

**Fig. S2** Comparison of the Raman plots for SBS/PStyr and SBS/PStyr/CNT samples

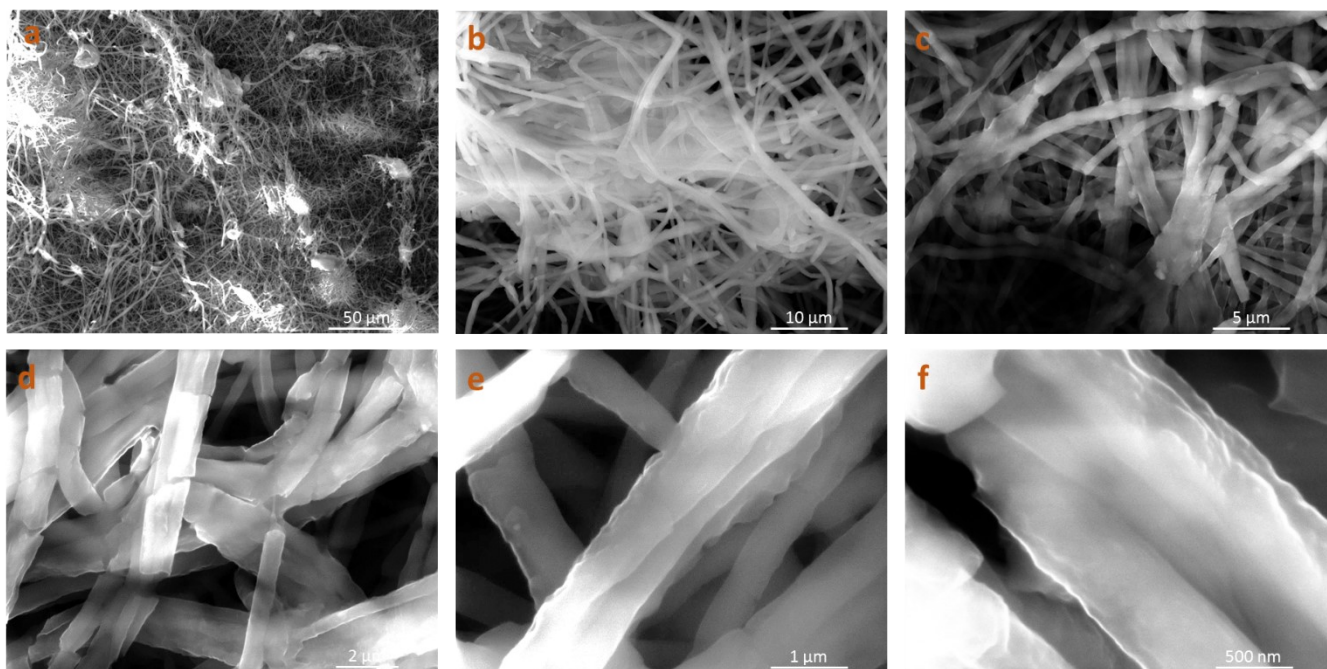

**Fig. S3** SEM imaging of the PStyr/PBu sample at (a) 1000×, (b) 5000×, (c) 10000×, (d) 20000×, (e) 50000×, (f) 100000×.

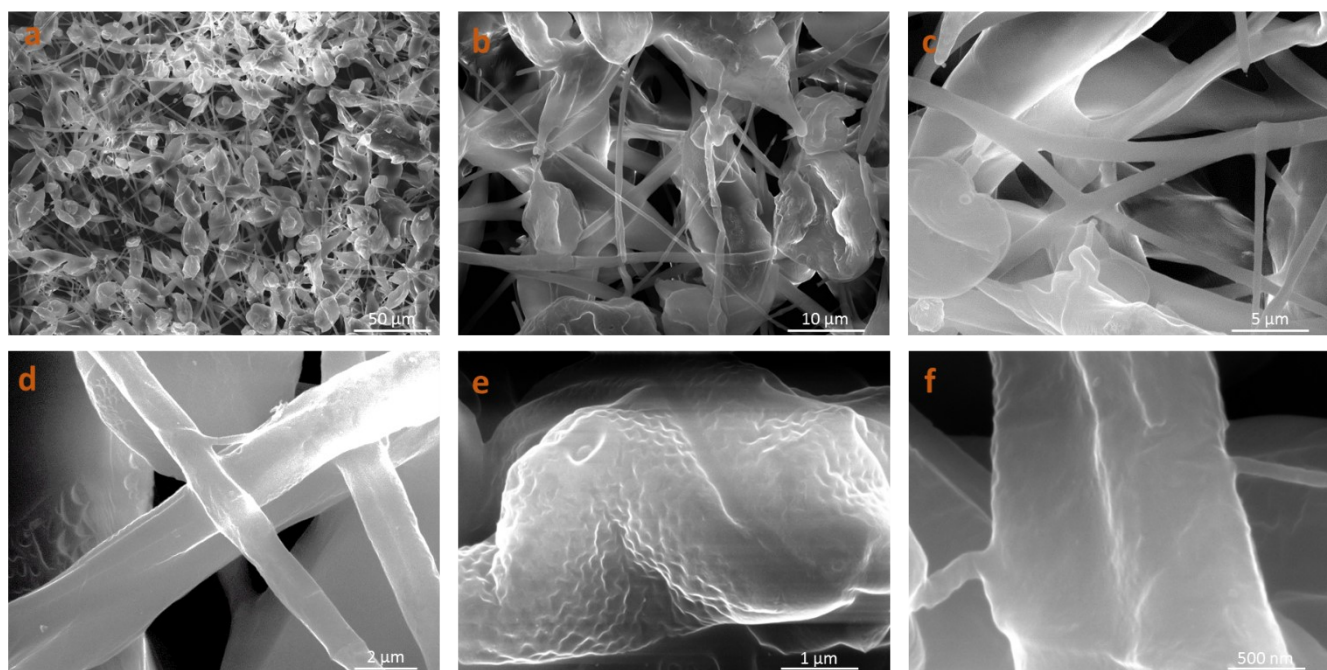

**Fig. S4** SEM imaging of the PStyr/PBu/CNT sample at (a) 1000×, (b) 5000×, (c) 10000×, (d) 20000×, (e) 50000×, (f) 100000×.
